# Supplementary material for: The Risk Factors of Child Lead Poisoning in China: A Meta-Analysis
Source: PubMed Central journal article supplement (PMC4808959; doi:10.3390/ijerph13030296), 2016-03-08
Supplement: ijerph-13-00296-s001.pdf [file ijerph-13-00296-s001.pdf]

# Supplementary Materials: The Risk Factors of Child Lead Poisoning in China: A Meta-Analysis

You Li, Jian Qin, Xiao Wei, Chunhong Li, Jian Wang, Meiyu Jiang, Xue Liang, Tianlong Xia and Zhiyong Zhang \*

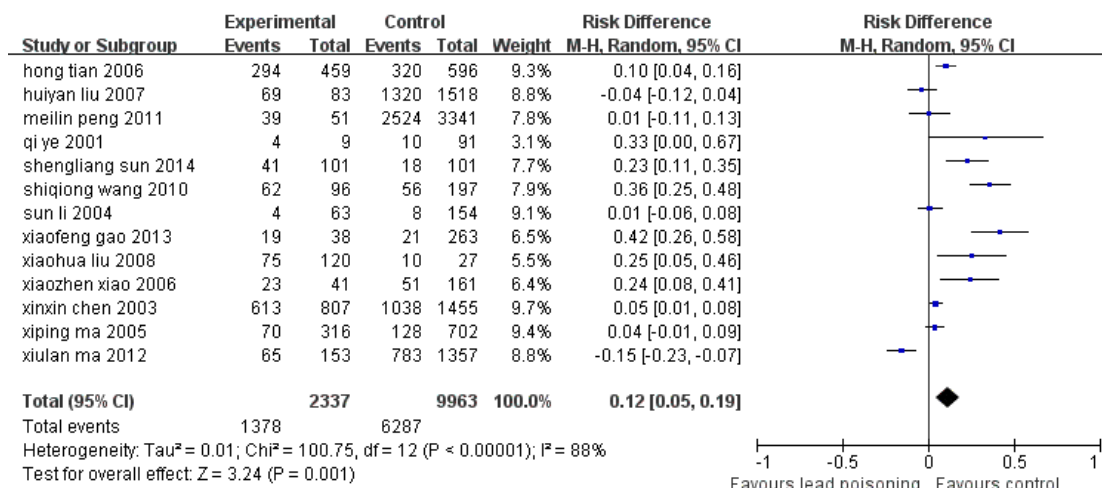

(a)

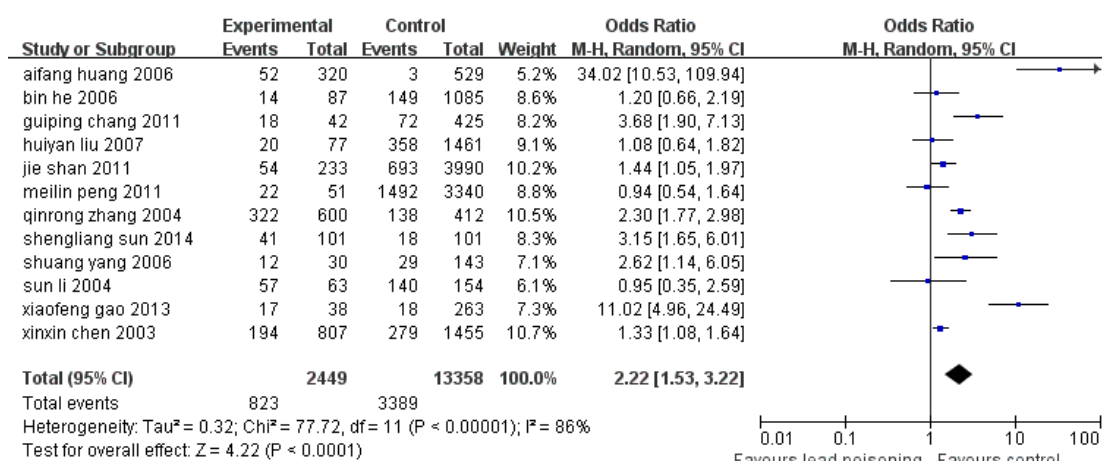

(b)

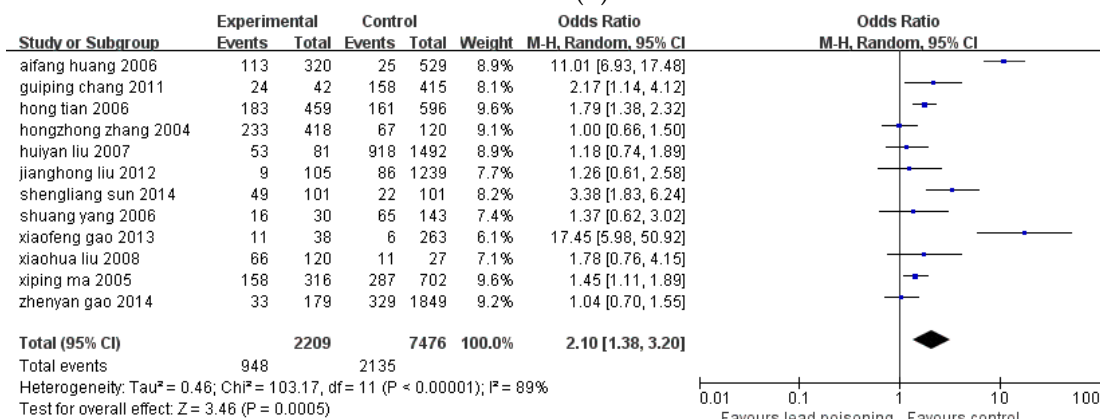

(c)

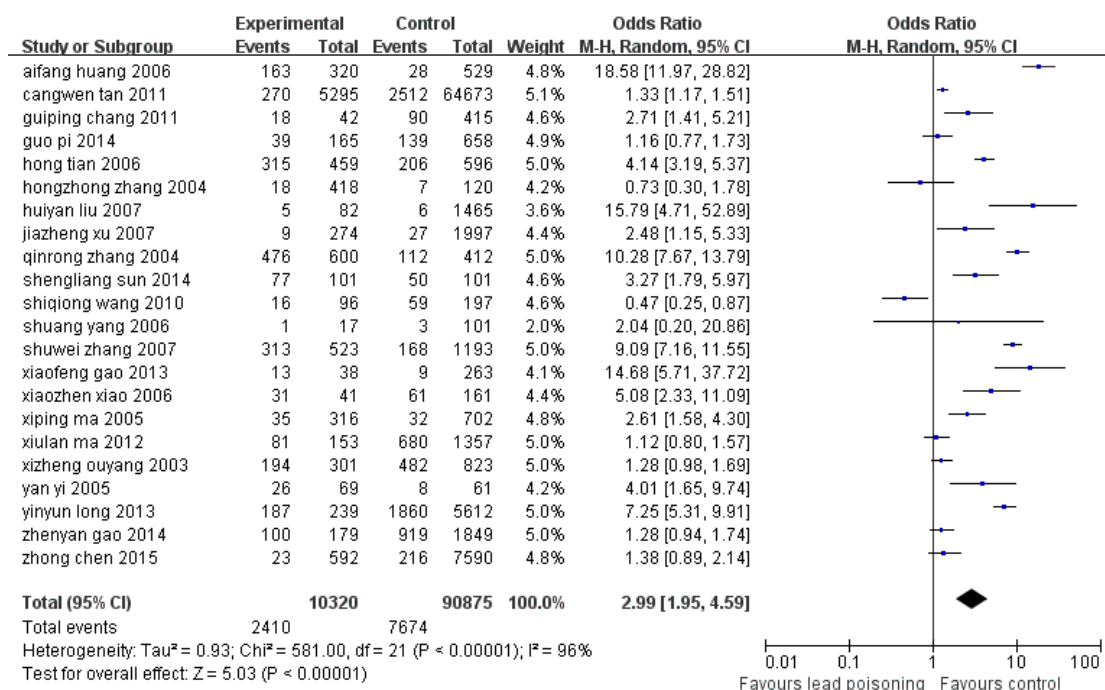

(d)

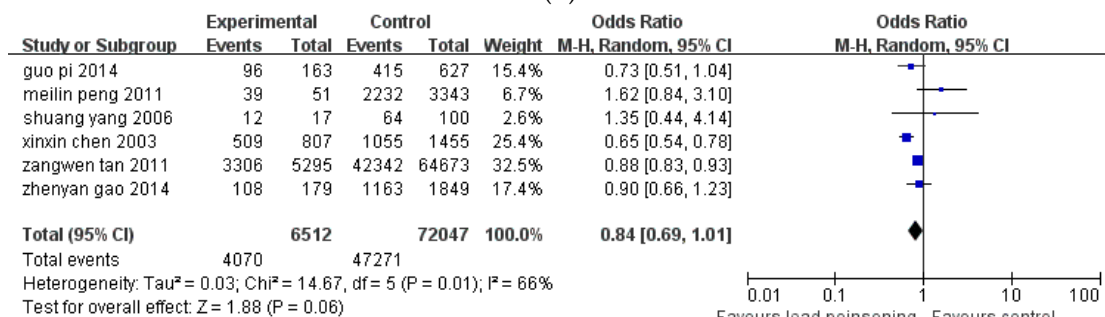

(e)

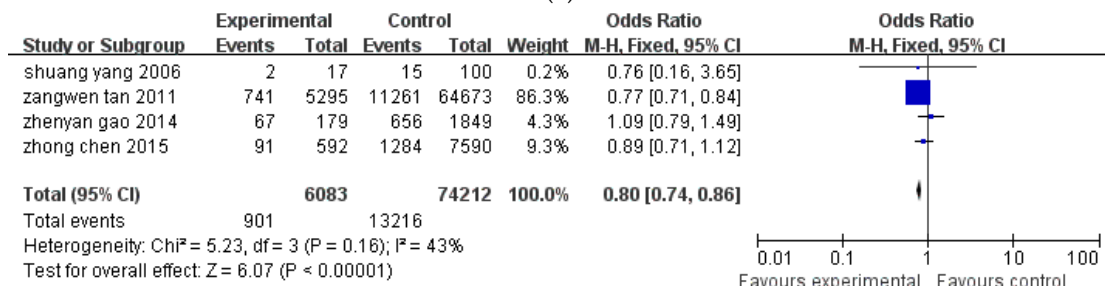

(f)

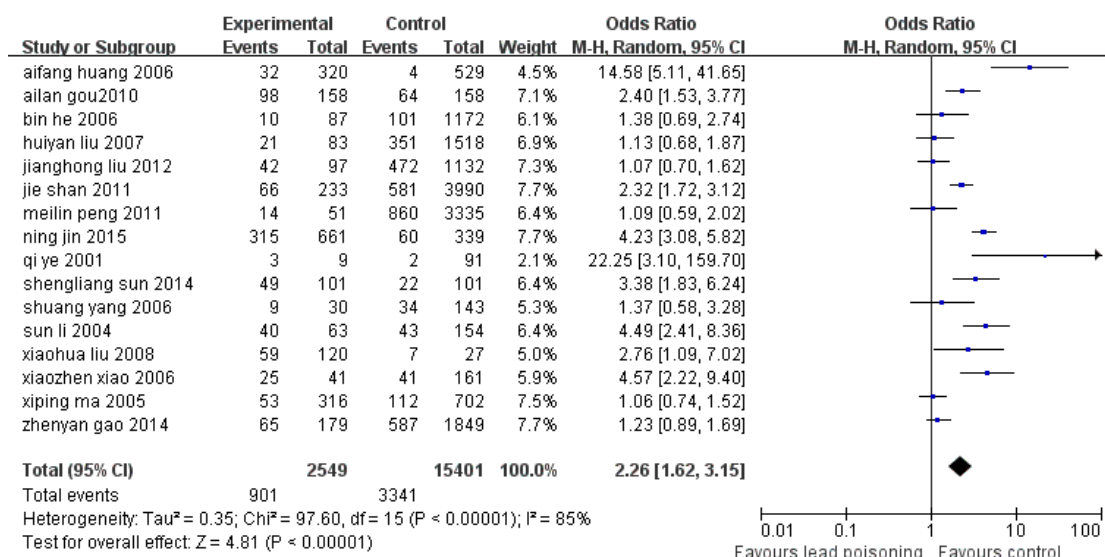

(g)

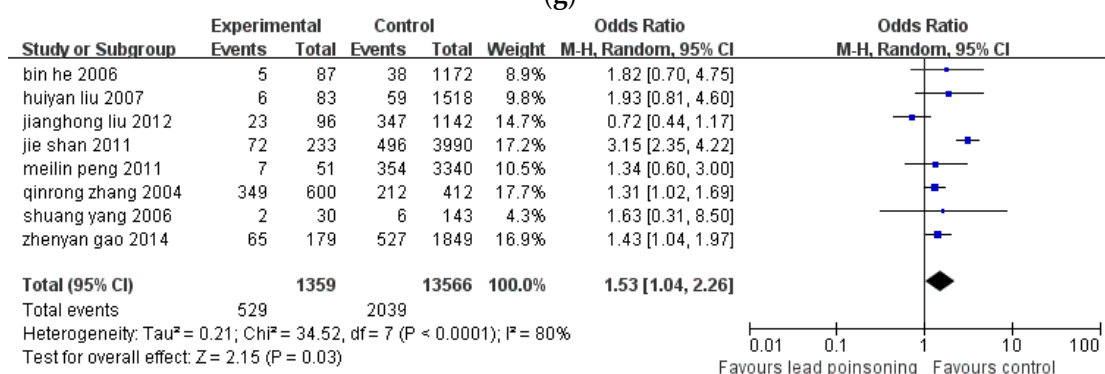

(h)

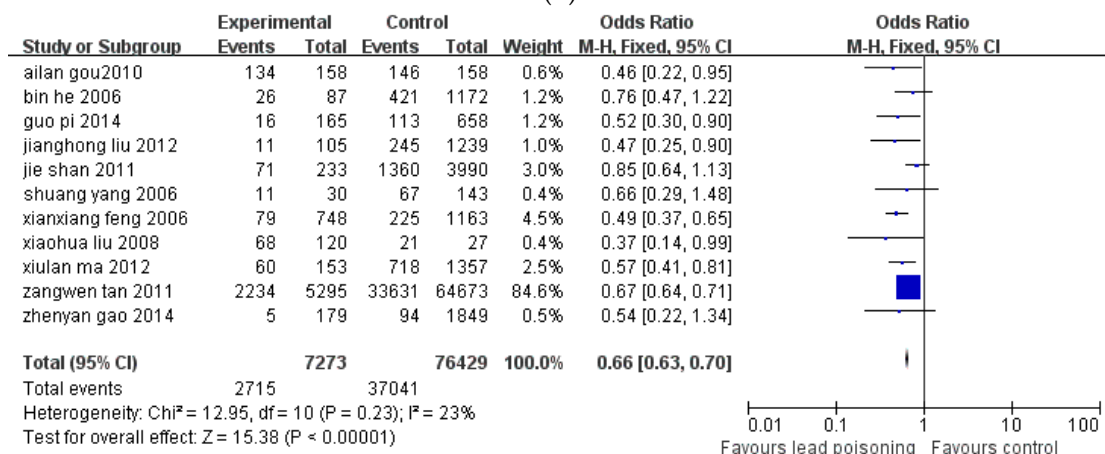

(i)

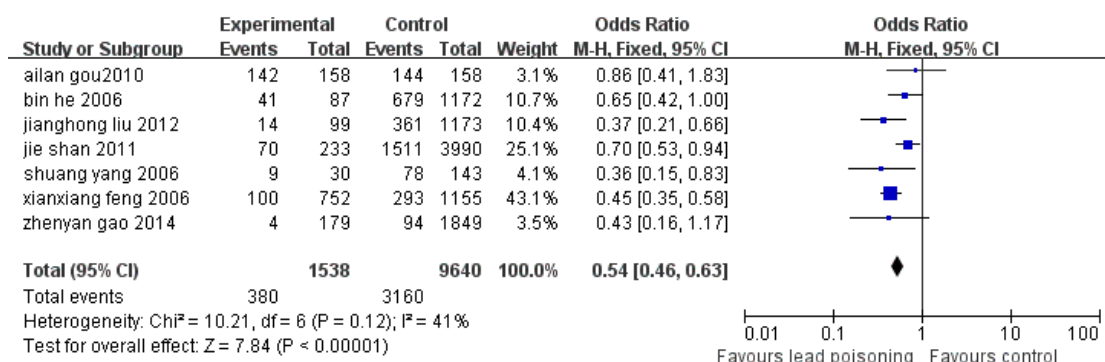

(j)

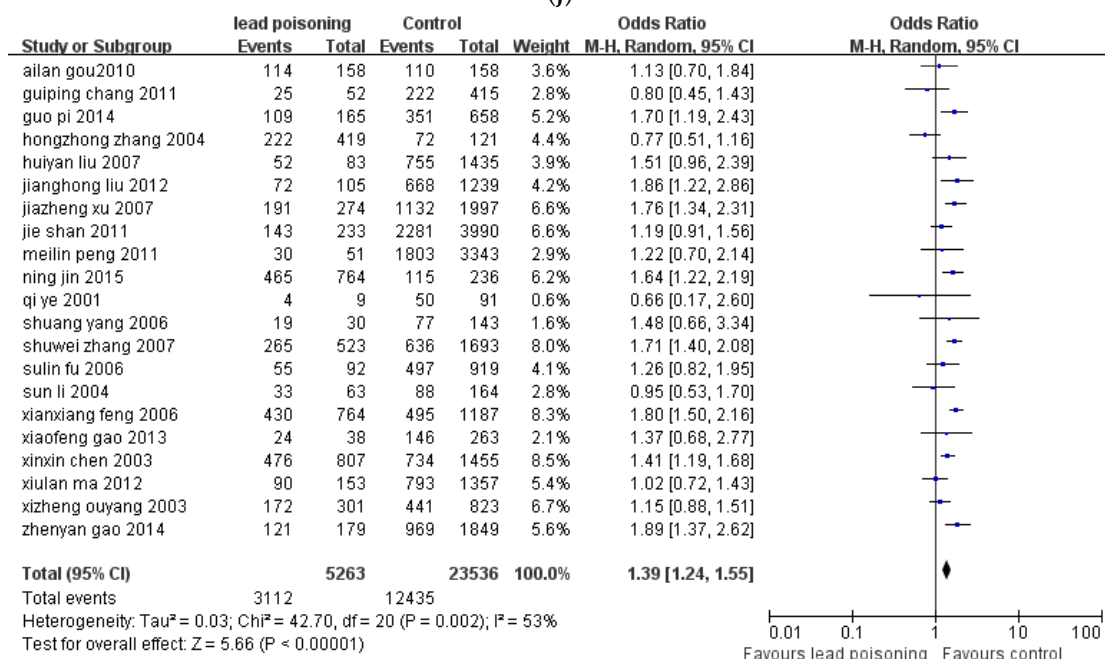

(k)

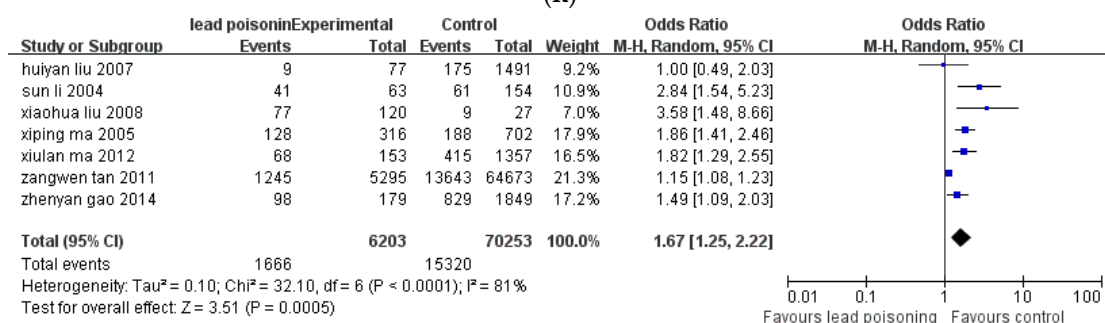

(l)

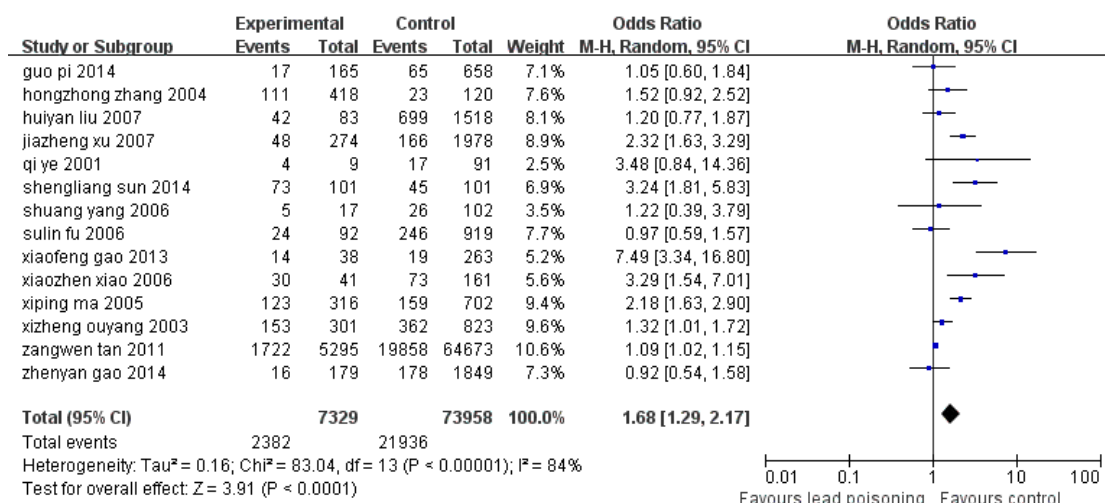

(m)

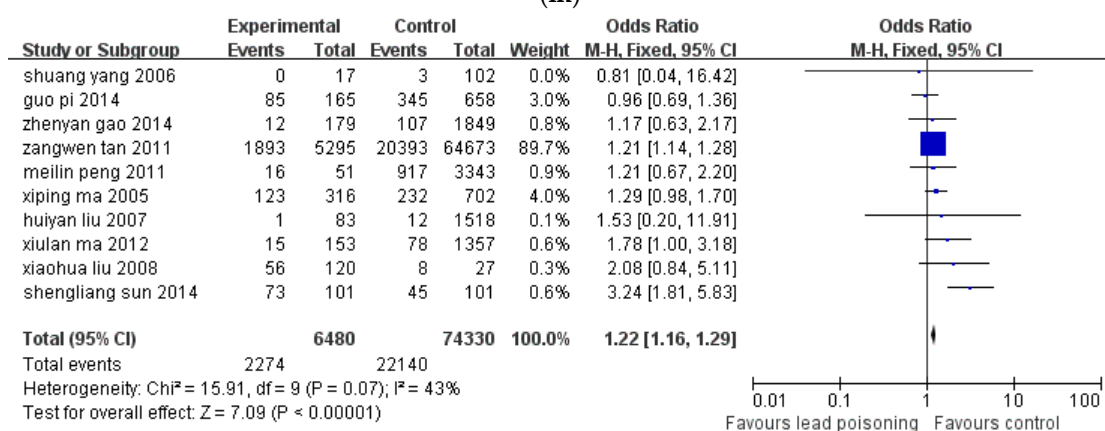

(n)

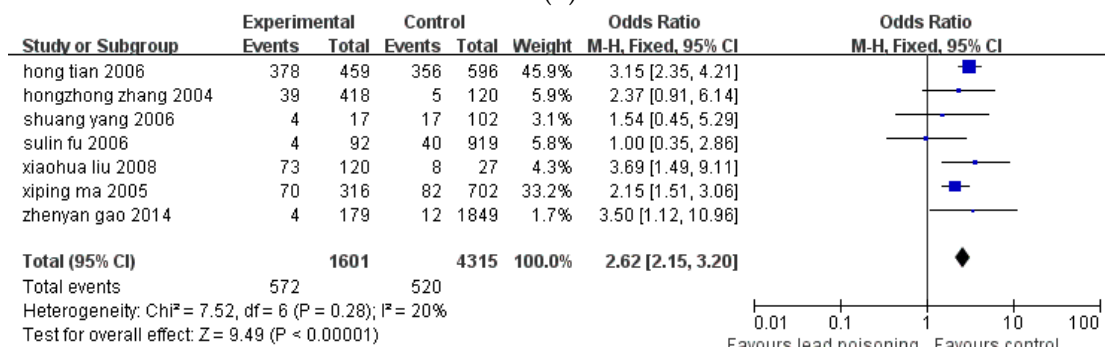

(o)

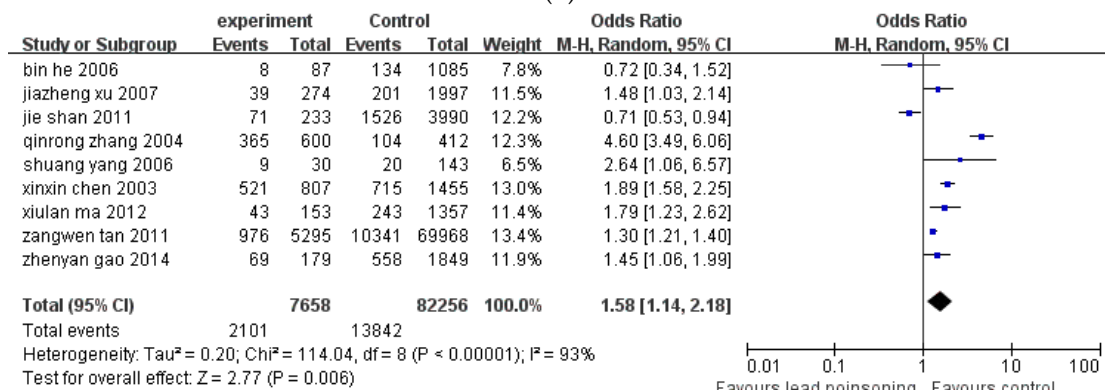

(p)

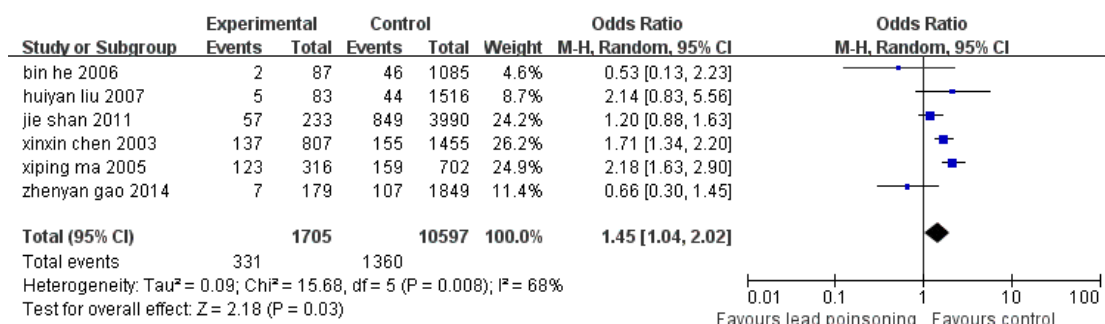

(q)

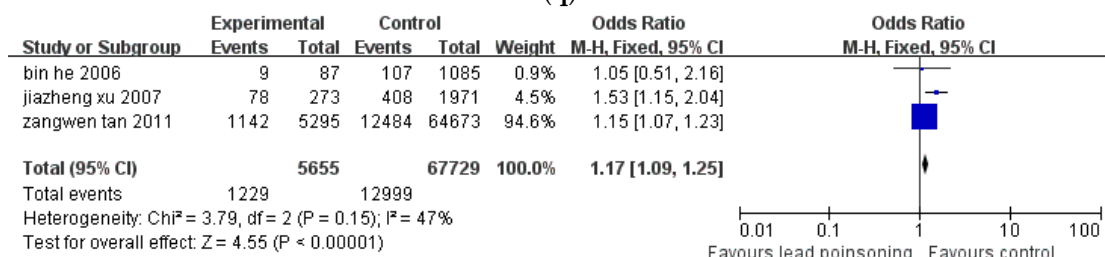

(r)

**Figure S1:** Forest plots for risk factors of child lead poisoning: (a) home painting; (b) living near main roads; (c) passive smoking; (d) often eating foods containing lead; (e) frequent consumption of dairy products; (f) daily intake of calcium, iron, and/or zinc supplements; (g) potential for father's occupational exposure to lead; (h) potential for mother's occupational exposure to lead; (i) mother's educational level; (j) father's educational level; (k) sex; (l) industry around the home; (m) hand-to-mouth activity; (n) no often washing hands at keytimes; (o) picky eating; (p) living on the ground floor; (q) coalburning; (r) peeling walls.

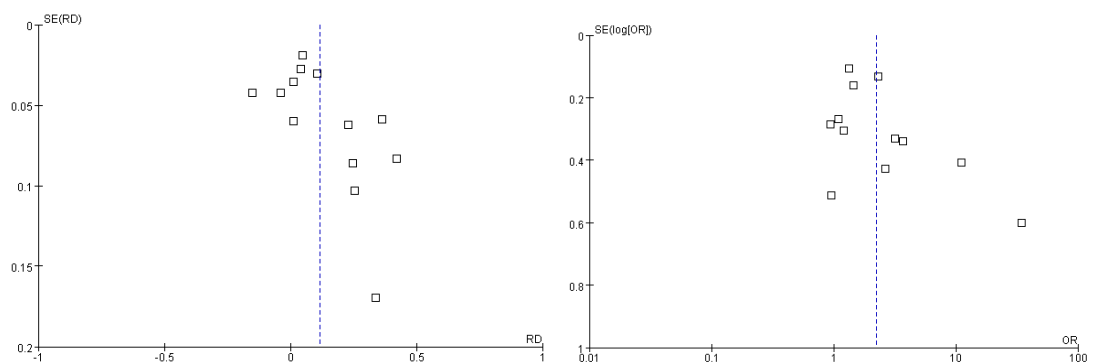

(a)

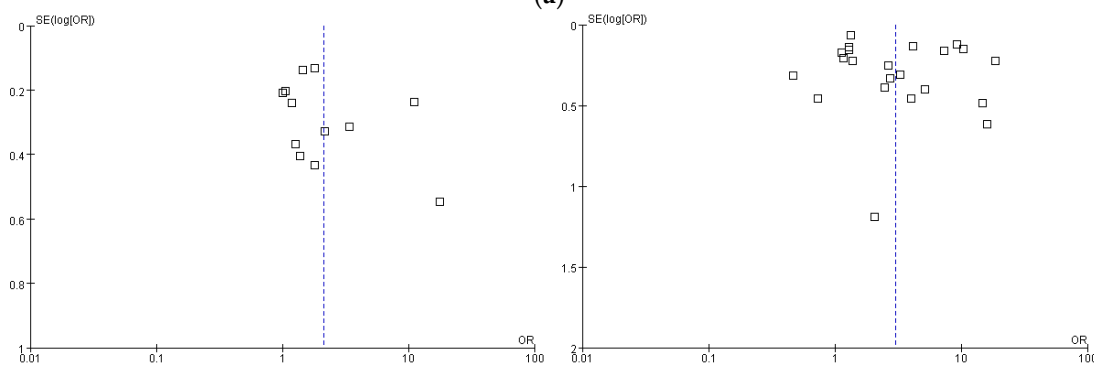

(b)

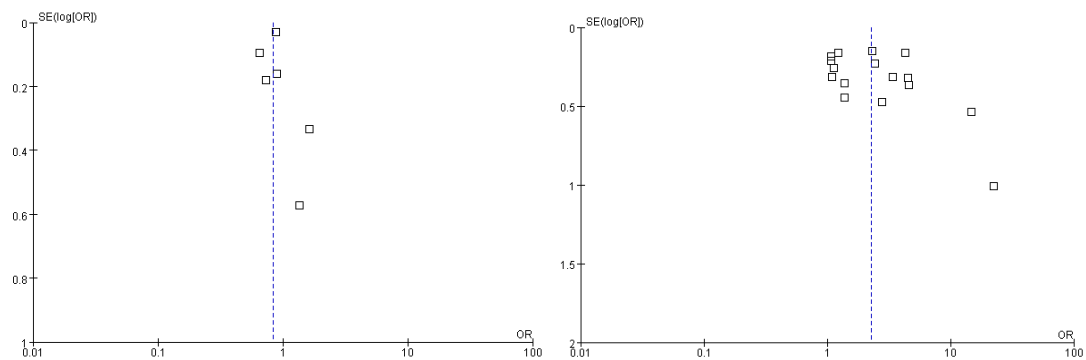

(c)

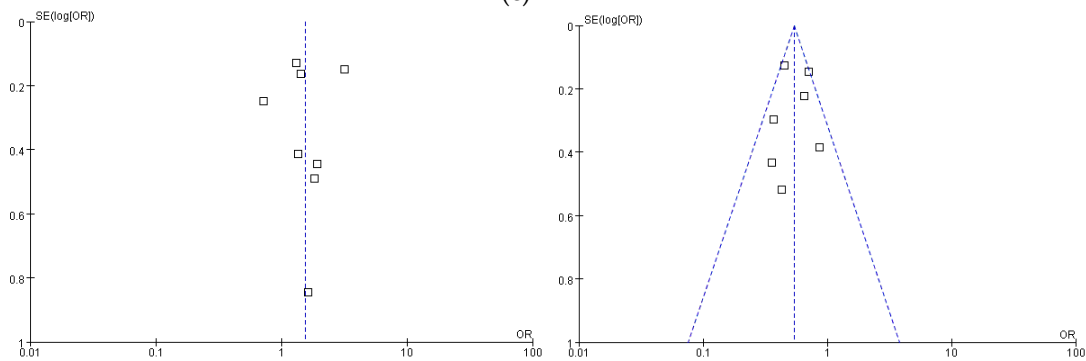

(d)

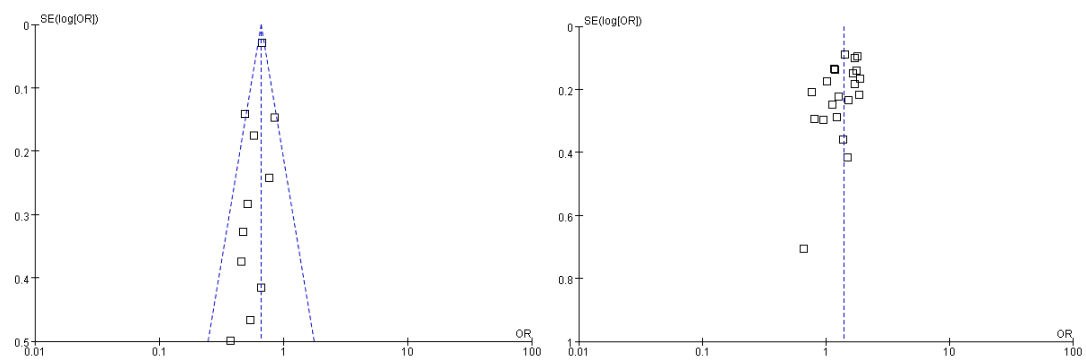

(e)

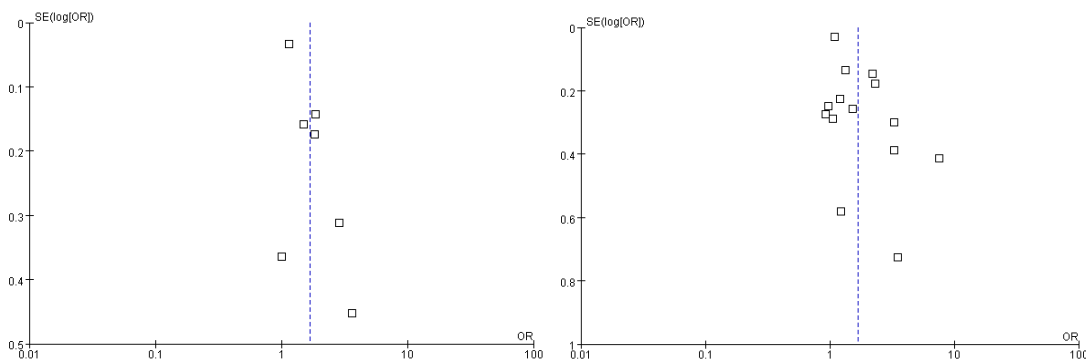

(f)

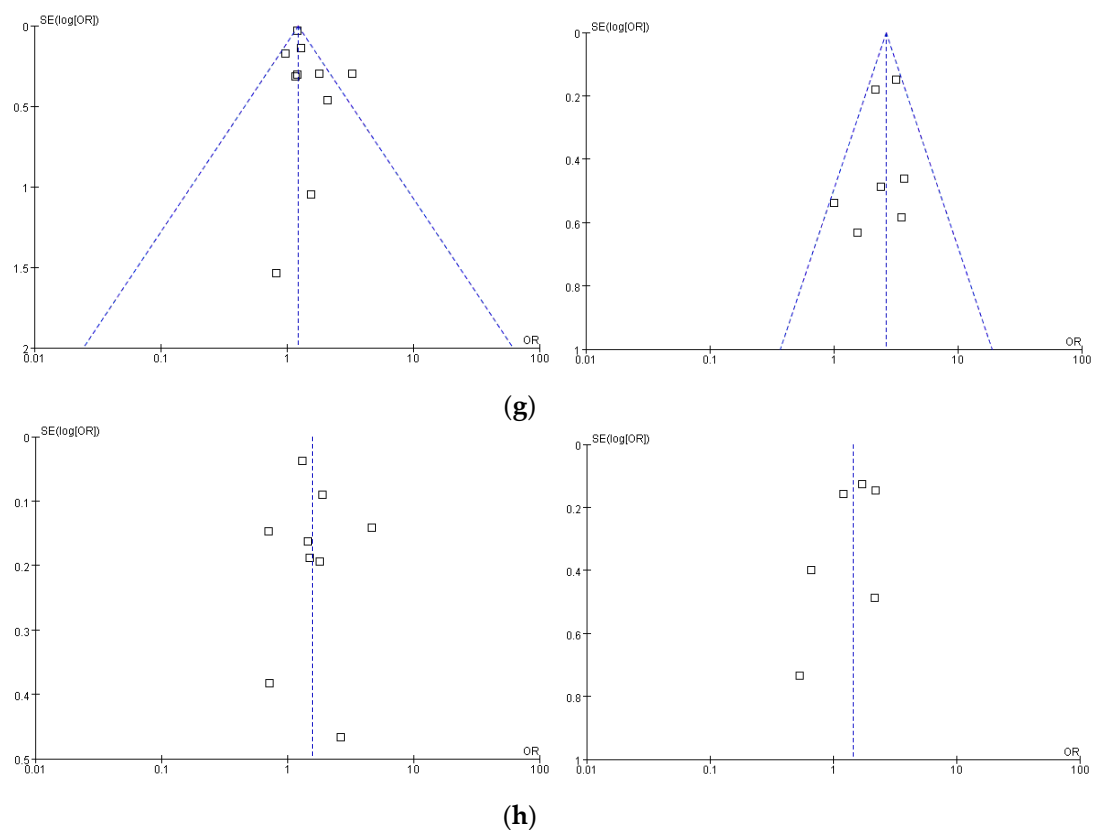

**Figure S2.** Funnel plots of risk factors for child lead poisoning. (a) home painting—living near main roads; (b) passive smoking—often eating foods containing lead; (c) frequent consumption of dairy products—potential for father's occupational exposure to lead; (d) potential for mother's occupational exposure to lead—father's educational level; (e) mother's educational level—sex; (f) industry around the home—hand-to-mouth activity; (g) no often washing hands at keytimes—picky eating; (h) living on the ground floor—coalburning.

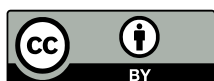

© 2016 by the authors; licensee MDPI, Basel, Switzerland. This article is an open access article distributed under the terms and conditions of the Creative Commons by Attribution (CC-BY) license (<http://creativecommons.org/licenses/by/4.0/>).
